# Supplementary material for: Phosphorus–nitrogen compounds. Part 35. Syntheses, spectroscopic and electrochemical properties, and antituberculosis, antimicrobial and cytotoxic activities of mono-ferrocenyl-spirocyclotetraphosphazenes
Source: Royal Society of Chemistry journal article supplement (doi:10.1039/c6nj00204h), 2016-01-01
Supplement: c6nj00204h1.pdf [file c6nj00204h1.pdf]

## Supplementary Info

### **Phosphorus-Nitrogen Compounds. Part 35. Syntheses, Spectroscopic and Electrochemical Properties, Antituberculosis, Antimicrobial and Cytotoxic Activities of Mono-Ferrocenyl-SpiroCyclotetraphosphazenes**

Aytuğ Okumuş<sup>\*a</sup>, Gamze Elmas<sup>a</sup>, Reşit Cemaloğlu<sup>a</sup>, Betül Aydın<sup>b</sup>, Arzu Binici<sup>c</sup>, Hülya Şimşek<sup>c</sup>, Leyla Açıkb, Mustafa Türk<sup>d</sup>, Remziye Güzel<sup>e</sup>, Zeynel Kılıç<sup>\*a</sup>, Tuncer Hökelek<sup>f</sup>

<sup>a</sup>Department of Chemistry, Ankara University, 06100 Ankara, Turkey

<sup>b</sup>Department of Biology, Gazi University, 06500 Ankara, Turkey

<sup>c</sup>Public Health Institution of Turkey, 06100 Ankara, Turkey

<sup>d</sup> Department of Bioengineering, Kırıkkale University, 71450 Kırıkkale, Turkey

<sup>e</sup>Department of Chemistry, Dicle University, 21280, Diyarbakır, Turkey

<sup>f</sup>Department of Physics, Hacettepe University, 06800 Ankara, Turkey

e-mail address: zkilic@science.ankara.edu.tr (Z. Kılıç)

okumus@science.ankara.edu.tr (A. Okumuş)

#### **Contents:**

#### Figures

- **Fig. S1** The (a) HSQC and (b) HMBC spectra of **5c**.
- **Fig. S2** The conformations of (a) the tetrameric phosphazene rings and (b) the six-membered spiro-rings (c) the packing diagram of **4a**.
- **Fig. S3** The conformations of (a) the tetrameric phosphazene rings and (b) the six-membered spiro-rings (c) the packing diagram of **5a**.
- **Fig. S4** The shape of the phosphazene rings in **4a** and **5a** with torsion angles (deg) given.

#### Table

- **Table S1** CVs data of ferrocenylphosphazene derivatives (1 mM each) obtained in acetonitrile (0.1 M TBATFB) at the gold electrode versus Ag/AgNO<sub>3</sub> (0.01 M). The scan rate is 100 mV s<sup>-1</sup>

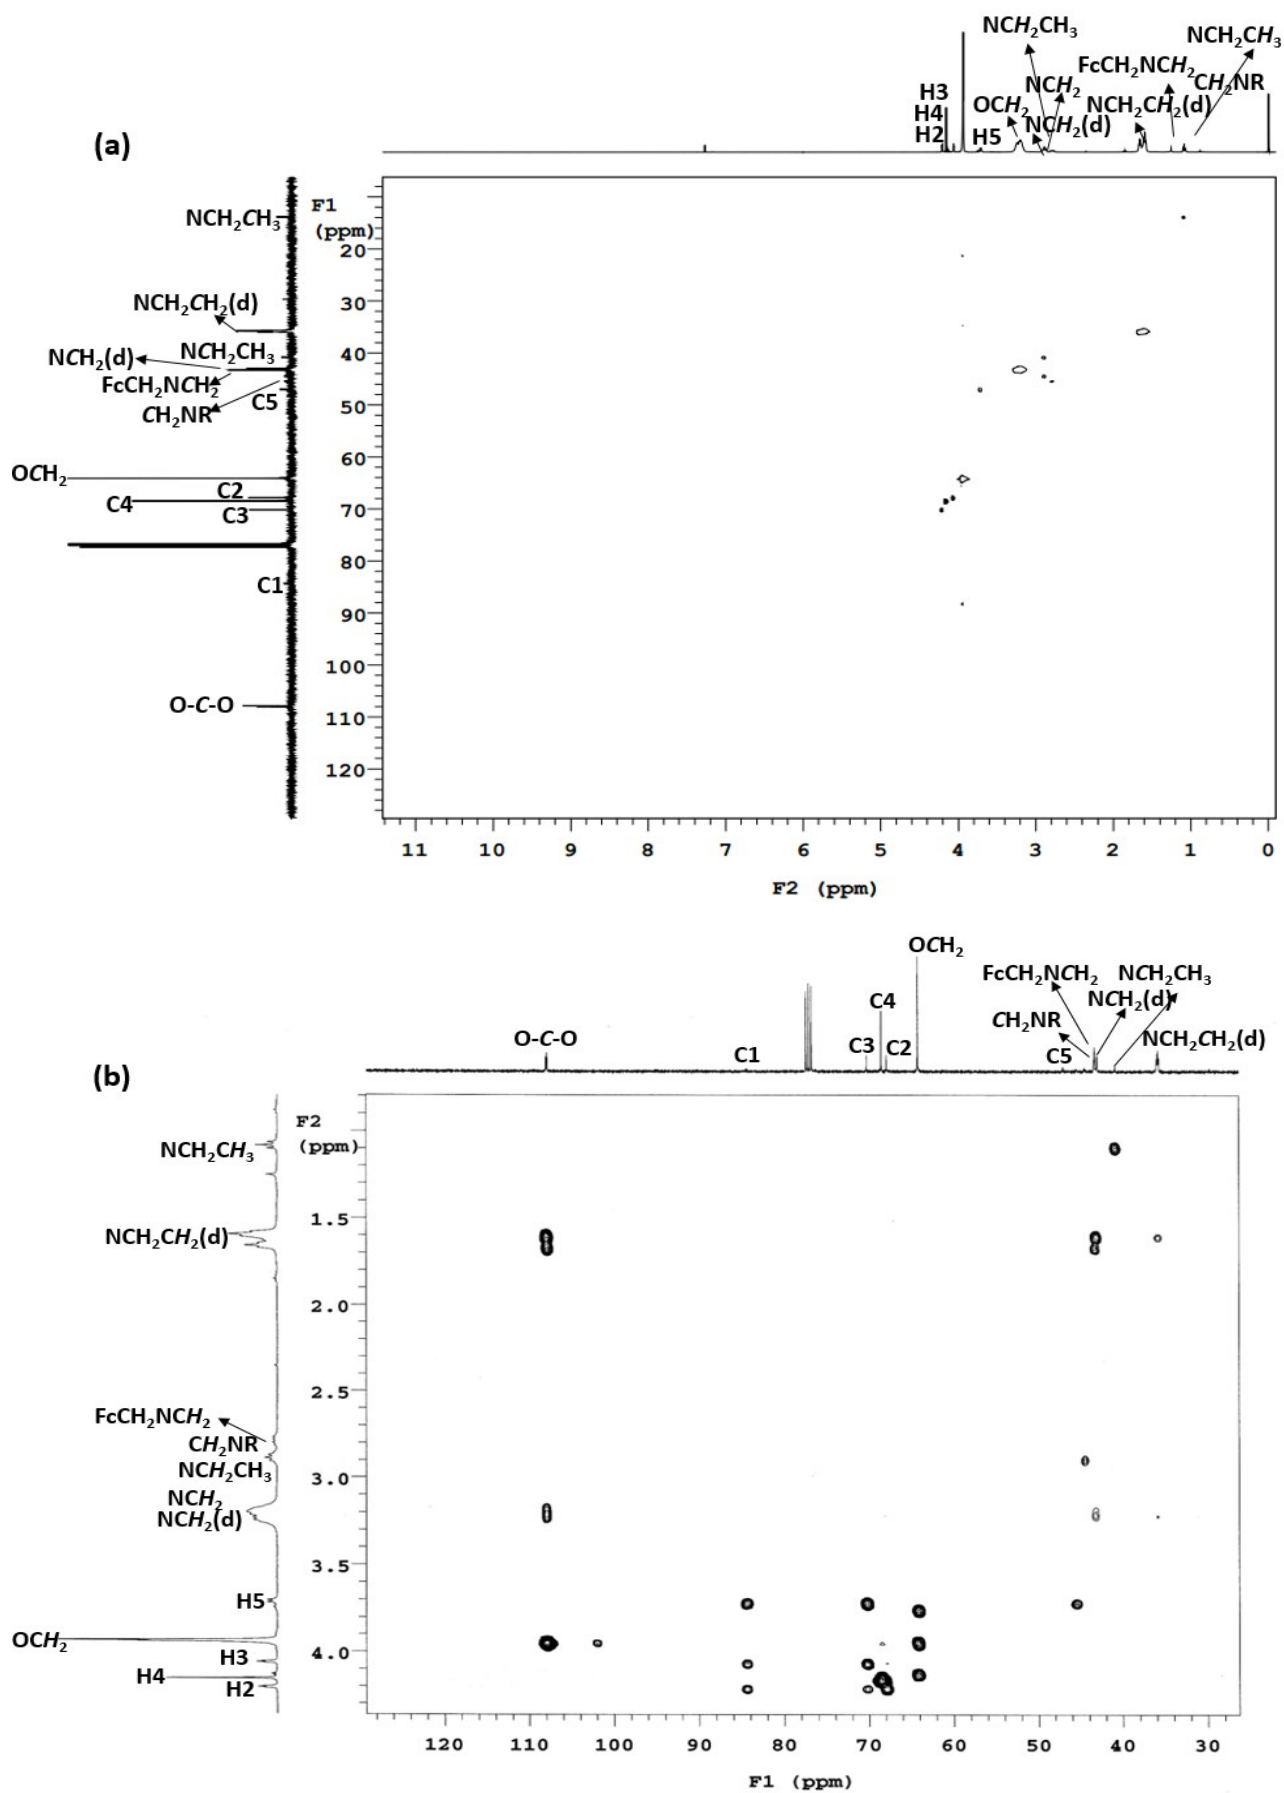

Fig. S1 The (a) HSQC and (b) HMBC spectra of **5c**.

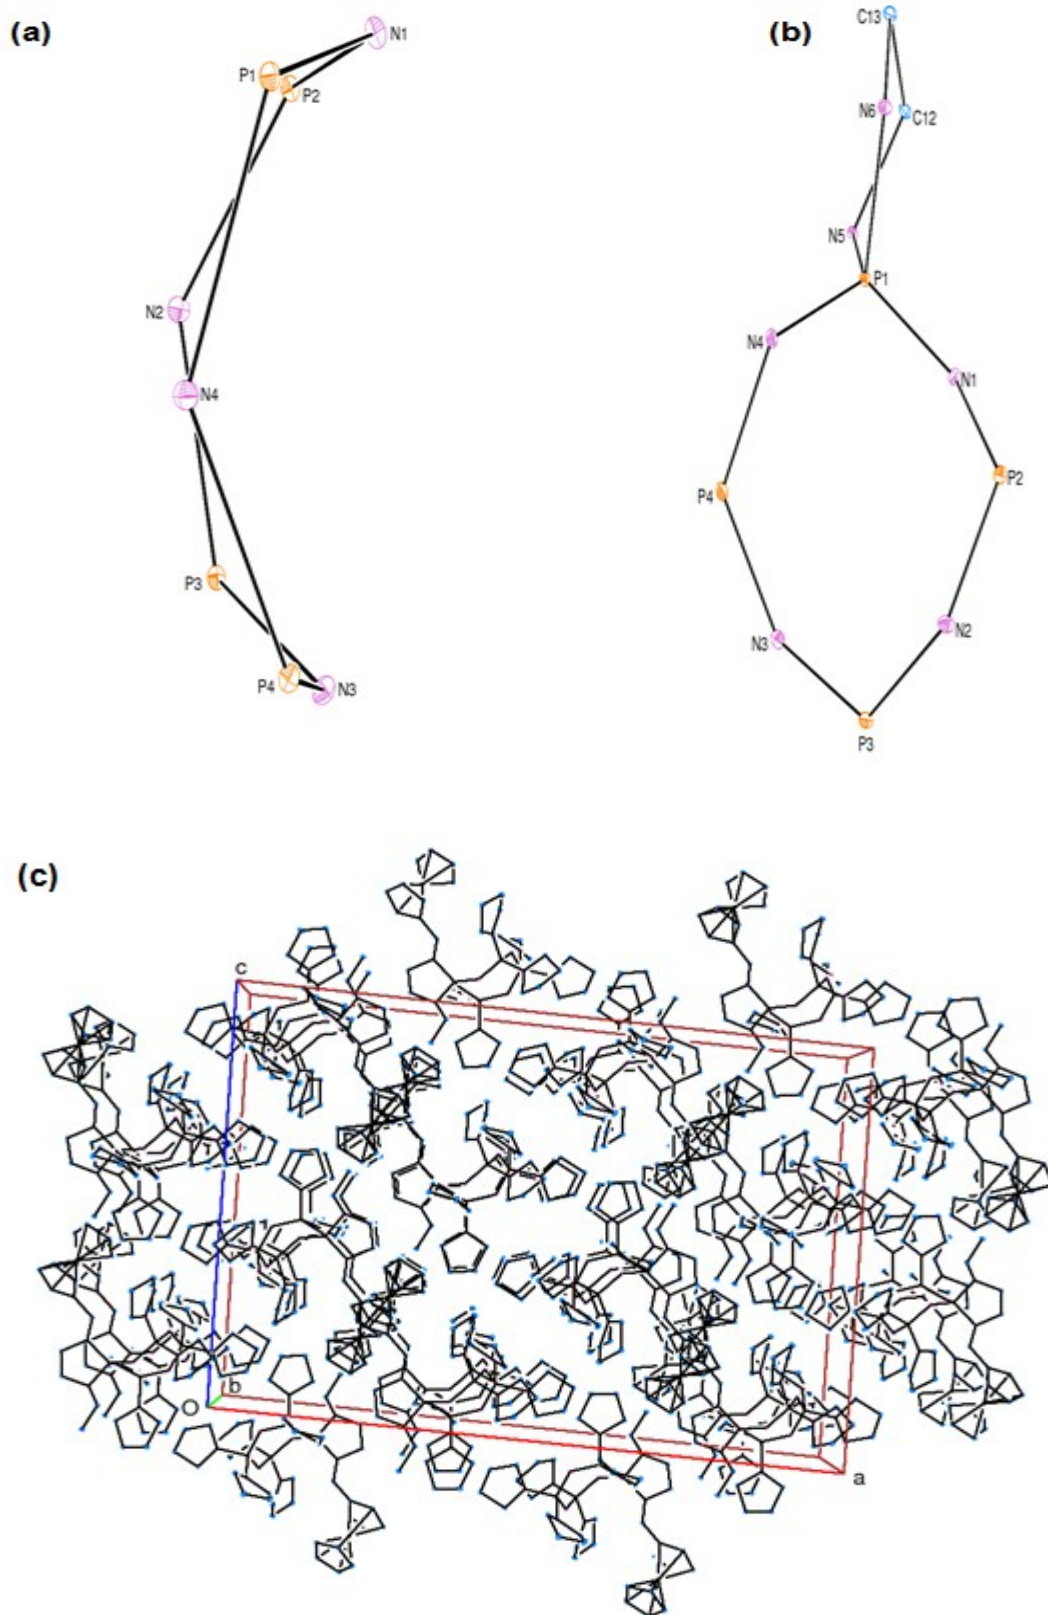

**Fig. S2** The conformations of (a) the tetrameric phosphazene rings and (b) the six-membered spiro-rings (c) the packing diagram of **4a**.

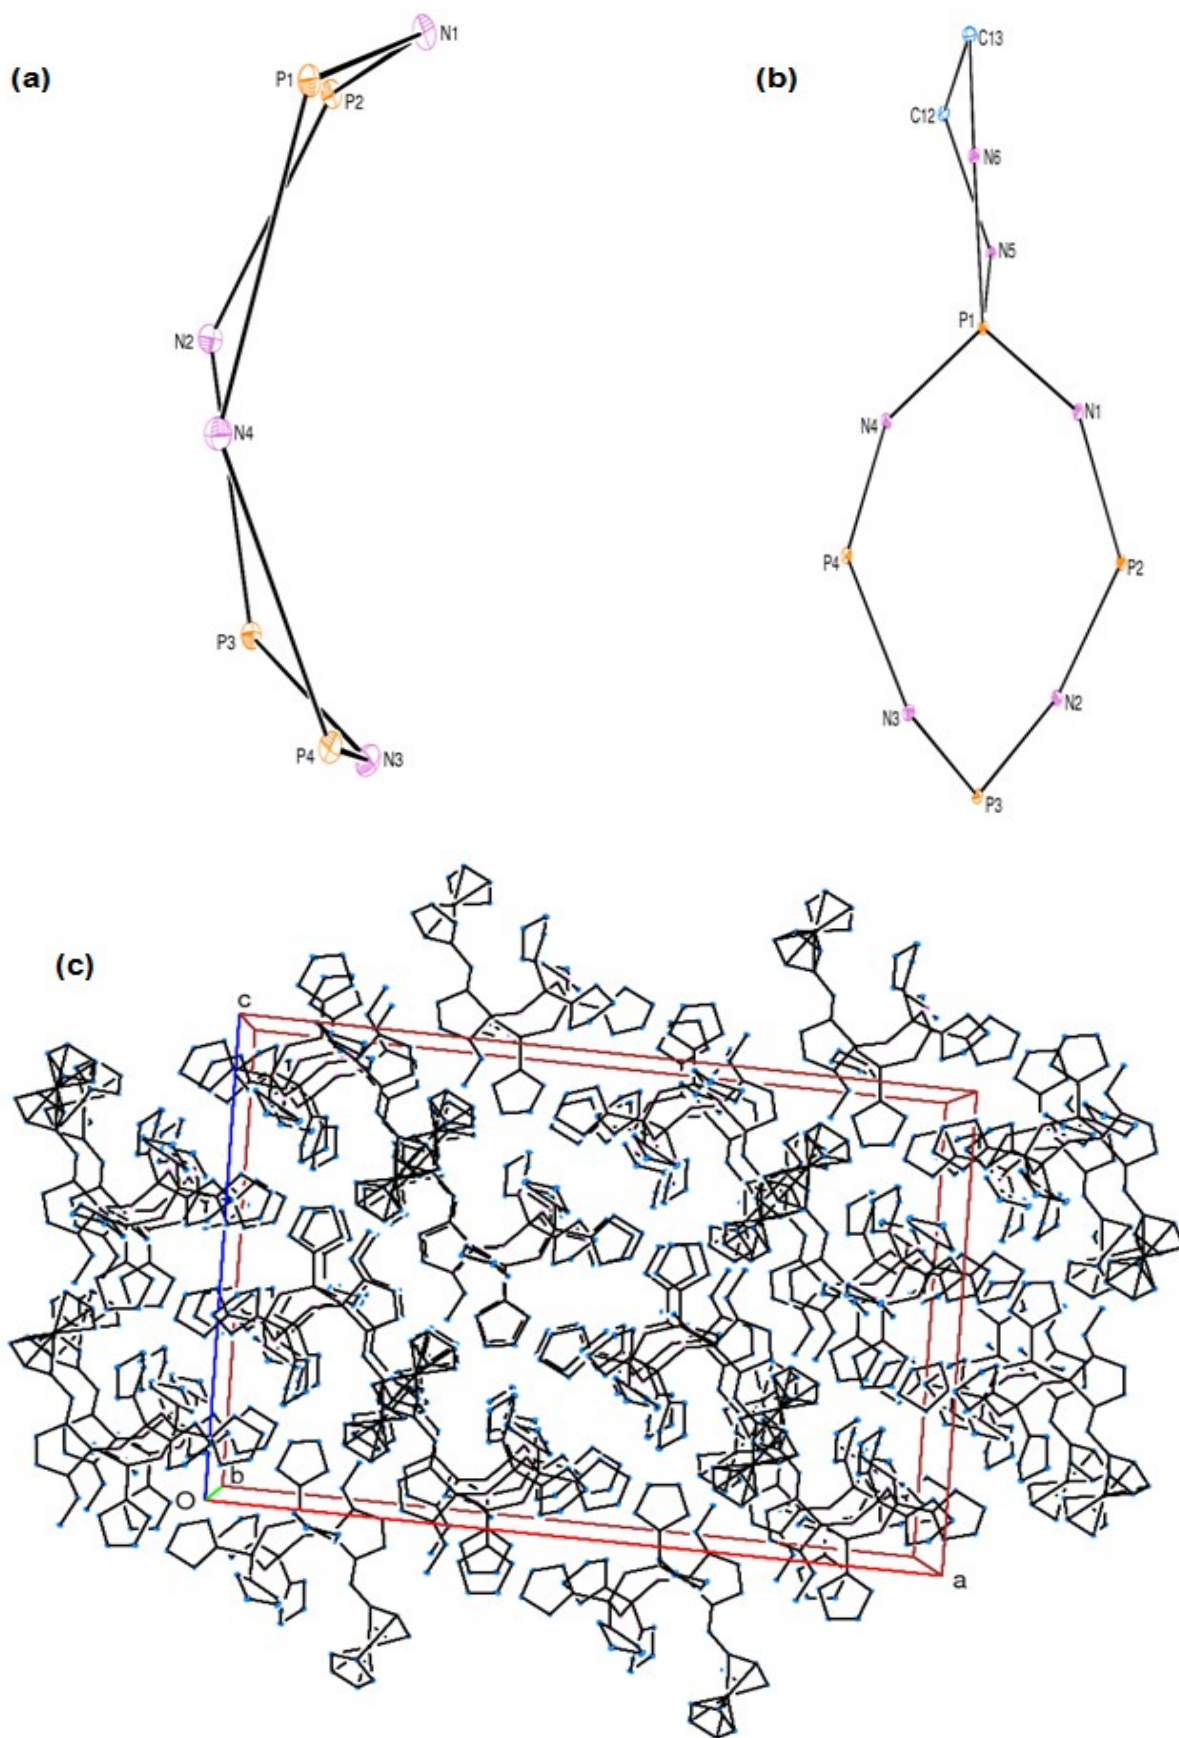

**Fig. S3** The conformations of (a) the tetrameric phosphazene rings and (b) the six-membered spiro-rings (c) the packing diagram of **5a**.

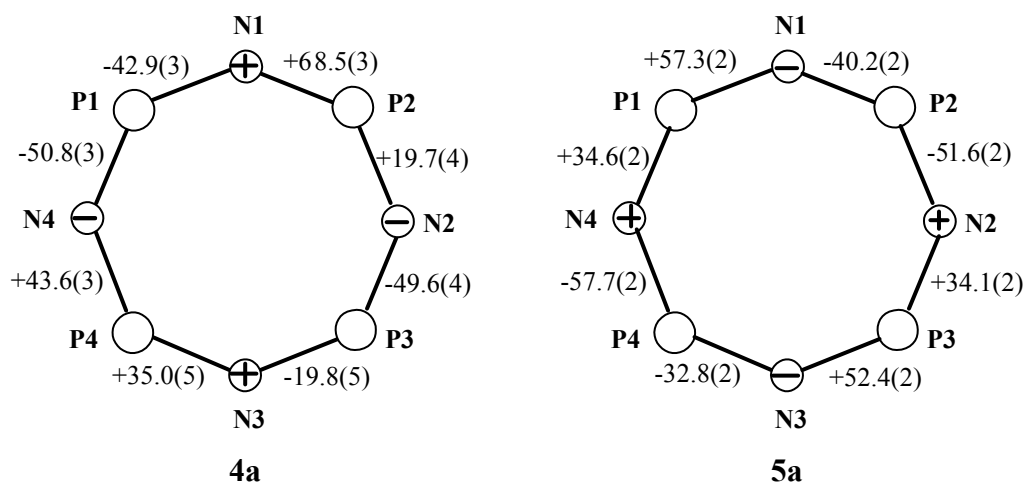

**Fig. S4** The shape of the phosphazene rings in **4a** and **5a** with torsion angles (deg) given.

**Table S1** CVs data of ferrocenylphosphazene derivatives (1 mM each) obtained in acetonitrile (0.1 M TBATFB) at the gold electrode versus Ag/AgNO<sub>3</sub> (0.01 M). The scan rate is 100 mV s<sup>-1</sup>

| Compound                                                                                                                                                                                                            | E <sub>pa</sub> , E <sub>pc</sub> , E <sup>o</sup> (≈ E <sub>1/2</sub> )* | ΔE <sub>p</sub><br>(E <sub>pa</sub> -E <sub>pc</sub> ) | i <sub>pa</sub> (μA) | i <sub>pc</sub> /i <sub>pa</sub> | Slope of<br>log (i <sub>a</sub> )-log (U) | D cm <sup>2</sup> s <sup>-1</sup> | Ref         |
|---------------------------------------------------------------------------------------------------------------------------------------------------------------------------------------------------------------------|---------------------------------------------------------------------------|--------------------------------------------------------|----------------------|----------------------------------|-------------------------------------------|-----------------------------------|-------------|
| <b>4a</b>                                                                                                                                                                                                           | 429, 354, 391                                                             | 75                                                     | 11.28                | 0.96                             | 0.51                                      | 1.77x10 <sup>-5</sup>             | This work   |
| <b>4b</b>                                                                                                                                                                                                           | 515, 436, 475                                                             | 79                                                     | 12.74                | 0.96                             | 0.52                                      | 0.75x10 <sup>-5</sup>             | This work   |
| <b>4c</b>                                                                                                                                                                                                           | 505, 422, 463                                                             | 83                                                     | 5.74                 | 0.97                             | 0.52                                      | 0.45x10 <sup>-5</sup>             | This work   |
| <b>5a</b>                                                                                                                                                                                                           | 431, 352, 391                                                             | 79                                                     | 12.92                | 0.97                             | 0.50                                      | 1.65x10 <sup>-5</sup>             | This work   |
| <b>5b</b>                                                                                                                                                                                                           | 519, 436, 477                                                             | 83                                                     | 14.90                | 0.96                             | 0.49                                      | 0.87x10 <sup>-5</sup>             | This work   |
| <b>5c</b>                                                                                                                                                                                                           | 491, 417, 454                                                             | 74                                                     | 7.86                 | 0.96                             | 0.51                                      | 0.54x10 <sup>-5</sup>             | This work   |
| <b>6a</b>                                                                                                                                                                                                           | 431, 353, 392                                                             | 78                                                     | 14.68                | 0.97                             | 0.49                                      | 1.65x10 <sup>-5</sup>             | This work   |
| <b>6b</b>                                                                                                                                                                                                           | 521, 436, 478                                                             | 85                                                     | 18.80                | 0.98                             | 0.51                                      | 0.96x10 <sup>-5</sup>             | This work   |
| <b>6c</b>                                                                                                                                                                                                           | 493, 412, 452                                                             | 81                                                     | 9.64                 | 0.97                             | 0.49                                      | 0.67x10 <sup>-5</sup>             | This work   |
| <b>N<sub>3</sub>P<sub>3</sub>[FcCH<sub>2</sub>N(CH<sub>2</sub>)<sub>3</sub>NH(pyrrolidino)<sub>4</sub>]</b>                                                                                                         | -, -, 130                                                                 | 76                                                     | 3.88                 | 0.93                             | 0.51                                      | -                                 | <b>[29]</b> |
| <b>N<sub>3</sub>P<sub>3</sub>[FcCH<sub>2</sub>N(CH<sub>2</sub>)<sub>2</sub>NCH<sub>3</sub>(pyrrolidino)<sub>4</sub>]</b>                                                                                            | 177, 90, 134                                                              | 87                                                     | 18.92                | 1.01                             | 0.51                                      | 0.96x10 <sup>-5</sup>             | <b>[38]</b> |
| <b>N<sub>3</sub>P<sub>3</sub>[FcCH<sub>2</sub>N(CH<sub>2</sub>)<sub>2</sub>NC<sub>2</sub>H<sub>5</sub>(pyrrolidino)<sub>4</sub>]</b>                                                                                | 165, 94, 130                                                              | 71                                                     | 19.55                | 0.93                             | 0.50                                      | 0.96x10 <sup>-5</sup>             | <b>[38]</b> |
| <b>N<sub>3</sub>P<sub>3</sub>[FcCH<sub>2</sub>N(CH<sub>2</sub>)<sub>2</sub>NCH<sub>3</sub>(vanillinato)<sub>4</sub>]</b>                                                                                            | 210, 155, 183                                                             | 55                                                     | 17.91                | 0.95                             | 0.53                                      | 2.74 × 10 <sup>-6</sup>           | <b>[4]</b>  |
| <b>N<sub>3</sub>P<sub>3</sub>[FcCH<sub>2</sub>N(CH<sub>2</sub>)<sub>2</sub>NC<sub>2</sub>H<sub>5</sub>(vanillinato)<sub>4</sub>]</b>                                                                                | 211, 156, 184                                                             | 55                                                     | 20.03                | 1.23                             | 0.49                                      | 3.08 × 10 <sup>-6</sup>           | <b>[4]</b>  |
| <b>N<sub>3</sub>P<sub>3</sub>[FcCH<sub>2</sub>N(CH<sub>2</sub>)<sub>3</sub>NH(vanillinato)<sub>4</sub>]</b>                                                                                                         | -, -, 87                                                                  | 115                                                    | 4.32                 | 0.93                             | 0.47                                      | -                                 | <b>[57]</b> |
| <b>N<sub>3</sub>P<sub>3</sub>[FcCH<sub>2</sub>N(CH<sub>2</sub>)<sub>3</sub>NH(morpholino)<sub>4</sub>]</b>                                                                                                          | 115, 46, 81                                                               | 69                                                     | 2.61                 | 0.85                             | 0.52                                      | -                                 | <b>[34]</b> |
| <b>N<sub>4</sub>P<sub>4</sub>Cl<sub>2</sub>[(FcCH<sub>2</sub>N(CH<sub>2</sub>)<sub>2</sub>NCH<sub>3</sub>) ({OC<sub>6</sub>H<sub>4</sub>CH<sub>2</sub>)<sub>2</sub>N(CH<sub>2</sub>)<sub>2</sub>N}]</b>             | 509, 440, 475                                                             | 69                                                     | 7.74                 | 0.95                             | 0.46                                      | 1.48 × 10 <sup>-5</sup>           | <b>[35]</b> |
| <b>N<sub>4</sub>P<sub>4</sub>Cl<sub>2</sub>[(FcCH<sub>2</sub>N(CH<sub>2</sub>)<sub>2</sub>NC<sub>2</sub>H<sub>5</sub>) ({OC<sub>6</sub>H<sub>4</sub>CH<sub>2</sub>)<sub>2</sub>N(CH<sub>2</sub>)<sub>2</sub>N}]</b> | 509, 435, 472                                                             | 74                                                     | 7.08                 | 0.94                             | 0.48                                      | 1.42 × 10 <sup>-5</sup>           | <b>[35]</b> |
| <b>N<sub>4</sub>P<sub>4</sub>Cl<sub>2</sub>[(FcCH<sub>2</sub>N(CH<sub>2</sub>)<sub>3</sub>NCH<sub>3</sub>) ({OC<sub>6</sub>H<sub>4</sub>CH<sub>2</sub>)<sub>2</sub>N(CH<sub>2</sub>)<sub>2</sub>N}]</b>             | 530, 445, 530                                                             | 85                                                     | 7.57                 | 1.01                             | 0.49                                      | 1.40 × 10 <sup>-5</sup>           | <b>[35]</b> |
| <b>N<sub>4</sub>P<sub>4</sub>Cl<sub>2</sub>[(FcCH<sub>2</sub>N(CH<sub>2</sub>)<sub>2</sub>NCH<sub>3</sub>) ({OC<sub>6</sub>H<sub>4</sub>CH<sub>2</sub>)<sub>2</sub>N(CH<sub>2</sub>)<sub>3</sub>N}]</b>             | 514, 445, 480                                                             | 69                                                     | 7.11                 | 1.02                             | 0.52                                      | 1.37 × 10 <sup>-5</sup>           | <b>[35]</b> |
| <b>N<sub>4</sub>P<sub>4</sub>Cl<sub>2</sub>[(FcCH<sub>2</sub>N(CH<sub>2</sub>)<sub>2</sub>NC<sub>2</sub>H<sub>5</sub>) ({OC<sub>6</sub>H<sub>4</sub>CH<sub>2</sub>)<sub>2</sub>N(CH<sub>2</sub>)<sub>3</sub>N}]</b> | 521, 436, 479                                                             | 85                                                     | 7.60                 | 0.95                             | 0.53                                      | 1.30 × 10 <sup>-5</sup>           | <b>[35]</b> |
| <b>N<sub>4</sub>P<sub>4</sub>Cl<sub>2</sub>[(FcCH<sub>2</sub>N(CH<sub>2</sub>)<sub>3</sub>NCH<sub>3</sub>) ({OC<sub>6</sub>H<sub>4</sub>CH<sub>2</sub>)<sub>2</sub>N(CH<sub>2</sub>)<sub>3</sub>N}]</b>             | 501, 437, 469                                                             | 64                                                     | 7.25                 | 0.98                             | 0.45                                      | 1.32 × 10 <sup>-5</sup>           | <b>[35]</b> |

The standard deviation is 0.58 mV for peak potential measurements, 0.11 μA for peak current measurements and 0.12x10<sup>-5</sup> cm<sup>2</sup> s<sup>-1</sup> for diffusion coefficients.

\*E<sub>1/2</sub> is calculated from the equation E<sub>1/2</sub> = [(E<sub>pa</sub> - E<sub>pc</sub>)/2]+E<sub>pc</sub> assuming reversible oxidation of Fc groups.
